# Supplementary material
Source: PubMed Central journal article supplement (PMC2644305)
Supplement: NIHMS3434-supplement-1.pdf [file NIHMS3434-supplement-1.pdf]

# Mechanistic and functional insights into fatty acid activation in *Mycobacterium tuberculosis*

Pooja Arora<sup>1†</sup>, Aneesh Goyal<sup>2†</sup>, Vivek T Natarajan<sup>1†</sup>, Eerappa Rajakumara<sup>2</sup>, Priyanka Verma<sup>1</sup>, Radhika Gupta<sup>3</sup>, Malikmohamed Yousuf<sup>2</sup>, Omita A. Trivedi<sup>1</sup>, Debasisa Mohanty<sup>1</sup>, Anil Tyagi<sup>3</sup>, Rajan Sankaranarayanan<sup>2\*</sup> and Rajesh S. Gokhale<sup>1, 4\*</sup>

<sup>1</sup>National Institute of Immunology, Aruna Asaf Ali Marg, New Delhi 110 067, India.

<sup>2</sup>Centre for Cellular and Molecular Biology, Council of Scientific and Industrial Research, Uppal Road, Hyderabad-500 007, India.

<sup>3</sup>Department of Biochemistry, University of Delhi South Campus, Benito Juarez Road, New Delhi 110021, India.

<sup>4</sup>Jawaharlal Nehru Centre for Advanced Scientific Research, Jakkur, Bangalore, India (by courtesy).

† Authors have contributed equally

\*Corresponding Authors.

## SUPPLEMENTARY INFORMATION

|           |                                   |    |
|-----------|-----------------------------------|----|
| Contents: | Supplementary Figures (5 figures) | 2  |
|           | Supplementary Tables (4 tables)   | 8  |
|           | Supplementary Method              | 12 |

a

|        |        |   |   |   |   |   |   |   |   |   |   |   |   |   |   |   |   |   |   |   |   |   |   |   |   |   |     |     |   |             |
|--------|--------|---|---|---|---|---|---|---|---|---|---|---|---|---|---|---|---|---|---|---|---|---|---|---|---|---|-----|-----|---|-------------|
|        |        | ↓ | ↓ | ↓ |   |   |   |   |   |   |   |   |   |   |   |   |   |   |   |   |   |   |   |   |   |   |     |     |   |             |
| FAAL23 | QTTAYL | Q | Y | T | S | G | S | T | R | T | P | A | G | V | M | I | T | Y | K | N | I | L | A | N | F | Q | Q   | 194 | } | <b>FAAL</b> |
| FAAL28 | PSTAYL | Q | Y | T | S | G | S | T | R | T | P | A | G | V | V | M | S | H | Q | N | V | R | V | N | F | E | Q   | 194 |   |             |
| FAAL24 | PETAYL | Q | Y | T | S | G | S | T | R | T | P | A | G | V | M | V | S | N | K | N | V | F | A | N | F | E | Q   | 199 |   |             |
| FAAL25 | PDILYL | Q | Y | T | S | G | S | T | R | T | P | A | G | V | M | V | S | N | K | N | L | F | A | N | F | E | Q   | 198 |   |             |
| FAAL21 | PSAAYL | Q | Y | T | S | G | S | T | R | A | P | A | G | V | M | I | S | H | R | N | L | Q | A | N | F | Q | Q   | 193 |   |             |
| FAAL26 | TGAAYL | Q | Y | T | S | G | S | T | R | T | P | A | G | V | I | V | S | H | T | N | V | I | A | N | V | T | Q   | 239 |   |             |
| FAAL29 | PSTAYL | Q | Y | T | S | G | S | T | R | A | P | A | G | V | V | L | S | H | K | N | V | I | T | N | C | V | Q   | 234 |   |             |
| FAAL30 | DWSSYL | Q | Y | T | S | G | S | T | A | N | P | R | G | V | V | L | S | M | R | N | V | T | E | N | V | D | Q   | 194 |   |             |
| FAAL31 | DAVSHL | Q | Y | T | S | G | S | T | R | P | P | V | G | V | E | I | T | H | R | A | V | G | T | N | L | V | Q   | 224 |   |             |
| FAAL32 | ETVAYL | Q | Y | T | S | G | S | T | R | I | P | S | G | V | Q | I | T | H | L | N | L | P | T | N | V | V | Q   | 217 |   |             |
| FACL3  | QDVSDI | L | F | T | S | G | T | T | G | R | S | K | G | V | L | C | A | H | R | Q | S | L | S | A | S | A | S   | 200 | } | <b>FACL</b> |
| FACL35 | SDPVNI | Q | Y | T | S | G | T | T | A | Y | P | K | G | V | T | L | S | H | R | N | I | L | N | N | G | Y | L   | 219 |   |             |
| FACL2  | RRASII | I | L | T | S | G | T | T | G | T | P | K | G | A | N | R | N | T | P | P | T | L | A | P | I | G | G   | 250 |   |             |
| FACL12 | SHGKVI | L | L | T | S | G | T | T | G | T | P | K | G | A | - | R | H | S | G | G | I | G | T | L | K | A | 222 |     |   |             |
| FACL19 | ADAIYL | L | Y | T | G | G | T | T | G | F | P | K | G | V | M | W | R | H | E | I | Y | R | V | L | F | G | 197 |     |   |             |
| FACL5  | DSPALI | M | Y | T | S | G | T | T | G | R | P | K | G | A | V | L | T | H | A | N | L | T | G | Q | A | M | T   | 214 |   |             |
| FACL13 | DDNLFI | M | Y | T | S | G | T | T | G | H | P | K | G | V | V | H | T | H | E | S | V | H | S | A | A | S | 187 |     |   |             |
| FACL1  | MDPFMM | I | F | T | S | G | T | S | G | N | P | K | A | V | P | V | S | H | L | M | A | T | F | A | G | R | S   | 181 |   |             |
| FACL17 | ADLFML | I | F | T | S | G | T | S | G | D | P | K | A | V | K | C | S | H | R | K | V | A | I | A | G | V | T   | 180 |   |             |
| FACL8  | DQVIGL | T | Y | T | G | G | T | T | G | K | P | K | G | V | I | G | T | A | Q | S | I | A | T | M | T | S | I   | 239 |   |             |
| FACL33 | EGPAVL | Q | G | T | A | G | S | T | G | A | P | R | T | A | I | L | S | P | G | A | V | L | S | N | L | R | G   | 178 |   |             |
| FACL7  | PDDAMI | M | F | T | G | G | T | T | G | L | P | K | M | V | P | W | T | H | A | N | I | A | S | S | V | R | A   | 194 |   |             |
| FACL4  | REGDLL | Q | Y | S | S | G | T | T | G | R | P | K | G | I | K | R | E | L | P | H | V | S | P | D | A | A | P   | 215 |   |             |
| FACL6  | KDTAFY | I | F | T | S | G | T | T | G | F | P | K | A | S | V | M | T | H | R | W | L | R | A | L | A | V | 228 |     |   |             |
| FACL22 | DALAYA | T | Y | T | S | G | T | T | G | P | P | K | A | A | I | H | R | H | A | D | P | L | T | F | V | D | A   | 176 |   |             |
| FACL34 | DDDAYV | Q | Y | T | S | G | S | T | A | A | P | R | G | V | V | I | T | Y | R | N | L | L | S | N | M | R | A   | 200 |   |             |
| FACL10 | EDPLAM | I | F | T | S | G | T | T | G | E | P | K | A | V | L | L | A | N | R | T | F | F | A | V | P | D | I   | 200 |   |             |
| FACL15 | TDPATL | I | Y | T | S | G | T | T | G | R | P | K | G | C | Q | L | T | Q | S | N | L | V | H | E | I | K | G   | 210 |   |             |

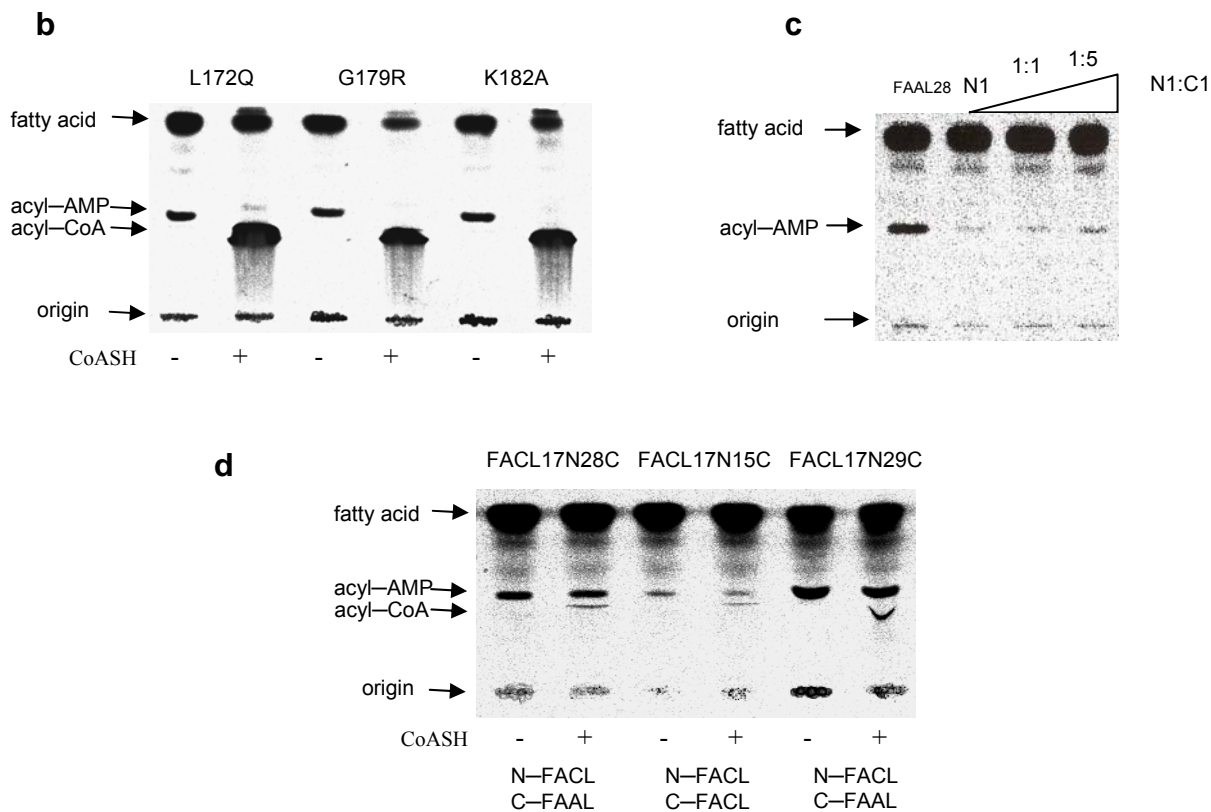

## Fig S1. Sequence based analyses of FAAL and FACL proteins

**(S1a).** Sequence alignment of representative FAAL and FACL homologues were carried out using ClustalW and a part of the alignment is depicted for clarity. The class-specific conservation of residues in the nucleotide binding motif is indicated by arrows.

**(S1b).** Enzyme assay carried out with FACL19 mutant proteins, FACL19L172Q (lane 1 and 2), FACL19G179R (lane 3 and 4) and FACL19K192A (lane 5 and 6) in the absence or presence of 1mM CoASH respectively and the products were separated on TLC. Acyl-AMP and acyl-CoA products were identified based on Rf.

**(S1c).** Enzyme assay performed with FAAL28 full length protein (lane 1), N1 protein (FAAL28; 1–460 amino acids) (lane 2), N1 protein with equimolar amount of C1 (FAAL28 460–580 amino acids) (lane 3), N1 and C1 in 1:5 molar ratio (lane 4) and the products were separated on TLC. Acyl-AMP and acyl-CoA products were identified based on Rf.

**(S1d).** Enzyme assay carried out with FACL17 hybrid proteins, FACL17N28C (lane 1 and 2), FACL17N15C (lane 3 and 4) and FACL17N29C (lane 5 and 6) in the absence or presence of 1mM CoASH respectively and the products were separated on TLC. Acyl-AMP and acyl-CoA products were identified based on Rf.

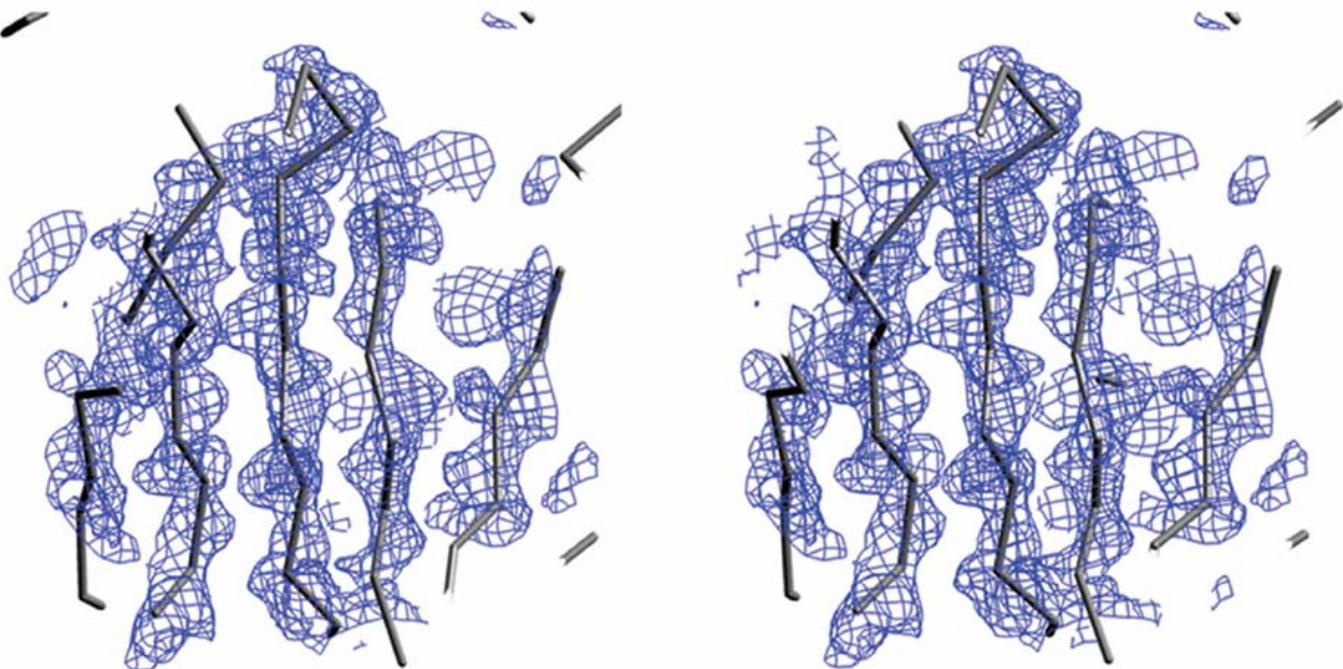

**Fig S2. Structure of FAAL28 N terminal domain**

A stereo representation of the experimental electron density map of a beta sheet of FAAL28 N terminal domain contoured at  $0.8 \sigma$

a

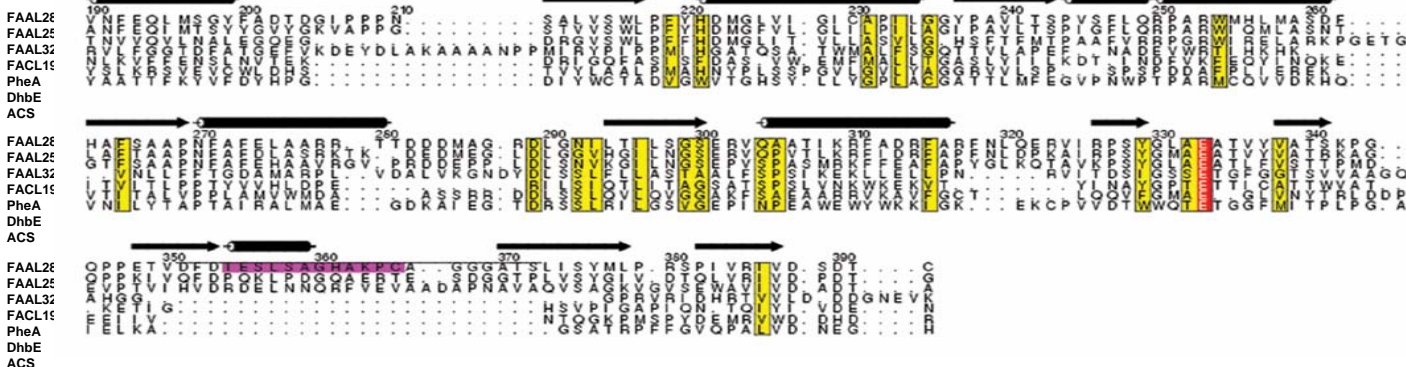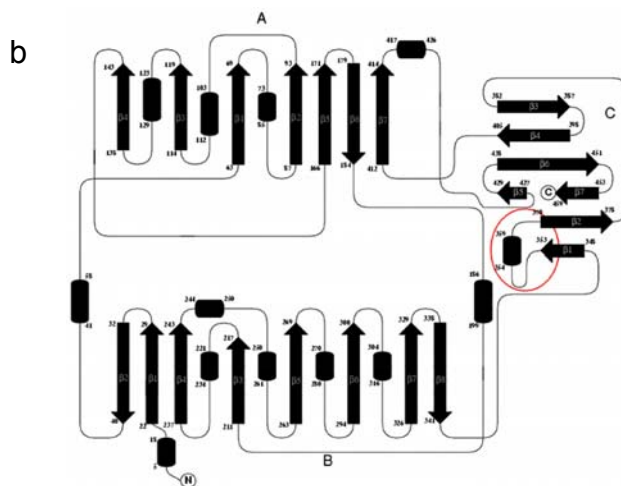

**Fig S3. Structure based sequence comparison and topology of FAAL28**

(S3a). Various FAAL proteins like FAAL25 and FAAL32, a FACL member (FACL19) and other structurally characterized homologous protein sequences were compared. The FAAL specific insertion is indicated by a line on top of the FAAL28 sequence spanning residues 351–372. Residues (354–365) deleted in FAAL28 $\Delta$  mutant, used for biochemical studies, are indicated in magenta.

(S3b). Topology diagram of N1 depicts the secondary structural elements and their connectivity in the N terminal domain of FAAL28, the FAAL specific insertion is encircled.

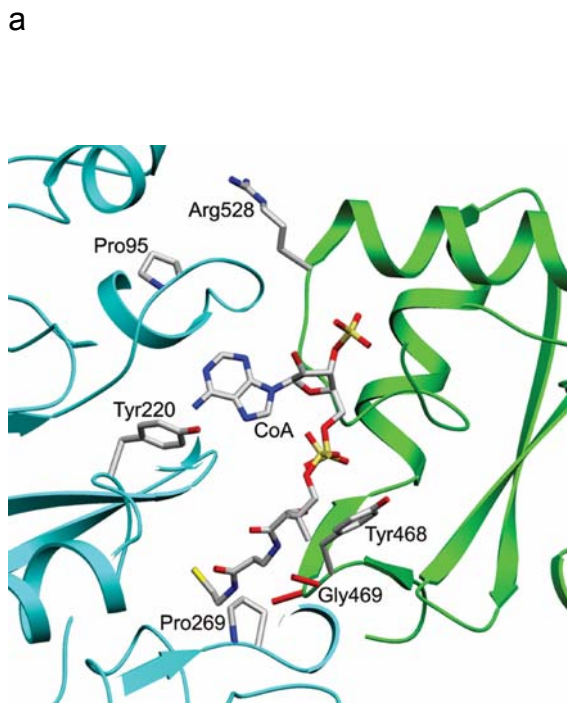

b

|        | N-terminal domain residues |      |      | C-terminal domain residues |      |      |
|--------|----------------------------|------|------|----------------------------|------|------|
|        |                            |      |      |                            |      |      |
| ACS    | F163                       | G165 | A357 | S523                       | G524 | R584 |
| FAAL28 | Y220                       | P95  | P269 | Y468                       | G469 | R528 |
| FAAL21 | Y219                       | P95  | P268 | Y467                       | G468 | N526 |
| FAAL23 | Y220                       | P95  | P269 | Y468                       | G469 | R524 |
| FAAL24 | Y225                       | P95  | P274 | Y473                       | G474 | R532 |
| FAAL25 | Y224                       | P97  | P273 | Y472                       | G473 | R531 |
| FAAL26 | Y220                       | P97  | P269 | D470                       | G471 | R529 |
| FAAL29 | Y257                       | P132 | P306 | D506                       | G507 | R565 |
| FAAL30 | Y220                       | P95  | P269 | D472                       | G473 | R531 |
| FAAL31 | Y245                       | P125 | P296 | D508                       | G509 | R573 |
| FAAL32 | F237                       | P118 | P289 | D498                       | G499 | R579 |
| FAAL33 | Y203                       | P87  | P251 | A421                       | G422 | L477 |
| FAAL34 | H220                       | R90  | P269 | H437                       | G438 | R489 |

### Fig S4 : Conservation of CoASH binding residues in mycobacterial FAAL proteins

(S4a). CoASH molecule docked into the active site of FAAL28 with C - terminal domain modeled in CoA binding conformation.

(S4b). Conserved residues involved in CoA binding highlighted across different FAALs.

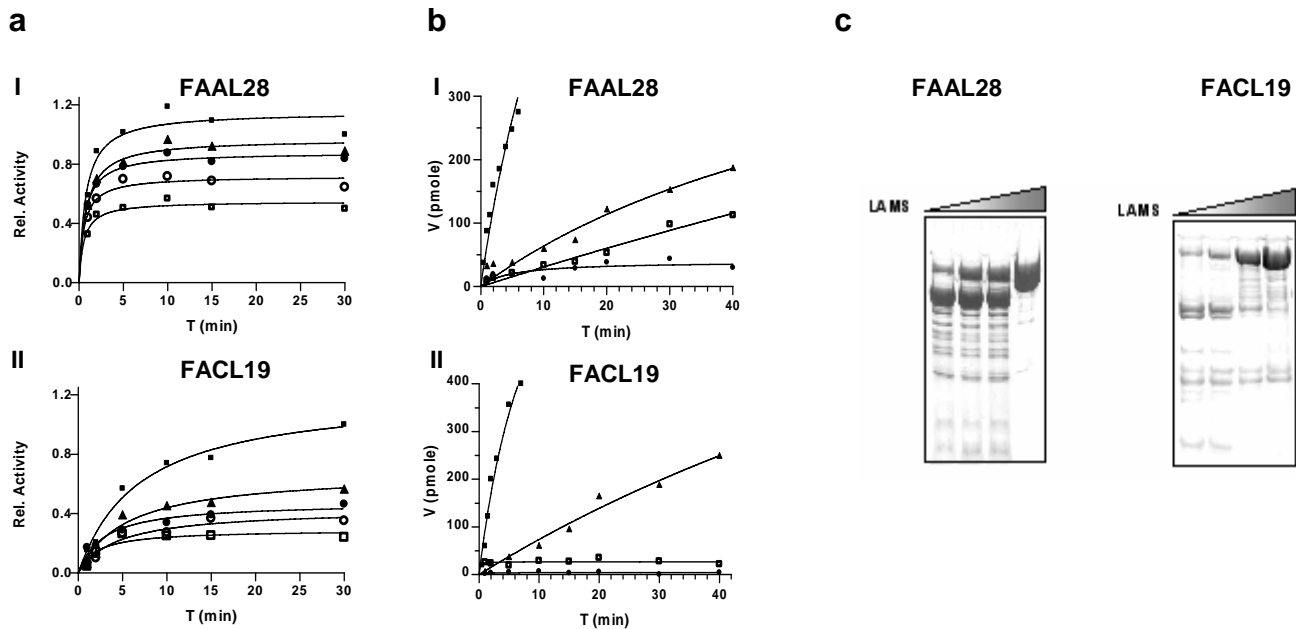

### Fig S5. Kinetic analysis of LAMS inhibition

(S5a). The Time dependent inhibition of FAAL (I) and FACL (II) proteins as a function of LAMS concentration. The concentrations of LAMS tested were: (■) 0nM, (▲) 25nM, (●) 50nM, (○) 75nM and (□) 200nM.

(S5b). Enzymatic turnover recovery assays. FAAL28 (I) and FACL19 (II) were incubated with LAMS for (▲) 15, (□) 30 and (●) 60 min. The control assays were performed with proteins incubated in the absence of LAMS for (■) 60min.

(S5c). Limited proteolysis of FAAL28 and FACL19 proteins in the presence of increasing concentrations of LAMS

**Supplementary Table 1 : FAAL and FAAL proteins generated for the inter-conversion studies and their properties**

| Protein                                 | Mutation (Insertion/ deletion)                                                                       | Protein expression and solubility status                      | Expected activity | Observed activity                              | Comments                                                                             |
|-----------------------------------------|------------------------------------------------------------------------------------------------------|---------------------------------------------------------------|-------------------|------------------------------------------------|--------------------------------------------------------------------------------------|
| FAAL19                                  | -                                                                                                    | soluble                                                       | Acyl-CoA forming  | Acyl-CoA forming                               | Km 24μM                                                                              |
| FAAL19 <sub>1</sub>                     | FAAL28 residues 342 to 372 inserted in place of residues 348 to 357 in FAAL19                        | Soluble and comparable expression to WT                       | Acyl-AMP-forming  | Acyl-AMP forming (at low CoASH concentrations) | Km for CoASH could not be determined as saturation of CoA formation was not observed |
| FAAL6                                   | -                                                                                                    | Soluble                                                       | Acyl-CoA forming  | Acyl-CoA forming                               |                                                                                      |
| FAAL6 <sub>1</sub>                      | FAAL28 residues 342 to 372 inserted in place of residues 362 to 376 in FAAL6                         | Poorly expressed and present in inclusion body                | Acyl-AMP-forming  | N.D                                            |                                                                                      |
| FAAL28                                  | -                                                                                                    | Soluble                                                       | Acyl-AMP-forming  | Acyl-AMP-forming                               |                                                                                      |
| FAAL28 <sub>Δ0</sub>                    | Deletion of residues 342 to 372                                                                      | Expressed but is present in inclusion body                    | Acyl-CoA forming  | N.D                                            |                                                                                      |
| FAAL28 <sub>Δ1</sub>                    | Deletion of residues 341 to 372                                                                      | Expressed but is present in inclusion body                    | Acyl-CoA forming  | N.D                                            |                                                                                      |
| FAAL28 <sub>Δ2</sub>                    | Deletion of residues 350 to 372                                                                      | Expressed in small amounts and does not purify to homogeneity | Acyl-CoA forming  | Acyl-CoA forming                               | No adenylate detected, and in the presence of CoASH synthesizes CoA                  |
| FAAL28 <sub>Δ3</sub>                    | Deletion of residues 357 to 372                                                                      | Expressed in small amounts and does not purify to homogeneity | Acyl-CoA forming  | Acyl-CoA forming                               | No adenylate detected and in the presence of CoASH synthesizes CoA                   |
| FAAL28 <sub>Δ</sub> (used for kinetics) | Deletion of residues 354 to 365                                                                      | Expresses and purified to homogeneity                         | Acyl-CoA forming  | Acyl-CoA forming                               | Km for CoASH >500μM                                                                  |
| FAAL30                                  | -                                                                                                    | Soluble                                                       | Acyl-AMP-forming  | Acyl-AMP-forming                               |                                                                                      |
| FAAL30 <sub>Δ</sub>                     | Deletion of residues 363 to 372                                                                      | Expressed in inclusion body                                   | Acyl-CoA forming  | N.D                                            |                                                                                      |
| FAAL19 <sub>AS</sub>                    | A A S A A S S A S S A A S sequence of amino acids inserted in place of residues 348 to 357 in FAAL19 | Soluble and comparable expression to WT                       | Acyl-AMP-forming  | FAAL makes very small amounts of CoA           | Km for CoASH could not be determined as saturation of CoA formation was not observed |



**Supplementary Table 2 : Fatty acid substrate specificity determined biochemically for different FAAL and FAAL proteins**

| <b>FadD</b> | <b>C<sub>6</sub></b> | <b>C<sub>12</sub></b> | <b>C<sub>16</sub></b> |
|-------------|----------------------|-----------------------|-----------------------|
| FAAL6       | +                    | +                     | +                     |
| FAAL8       | +                    | +                     | +                     |
| FAAL9       | N.D.                 | +                     | +                     |
| FAAL10      | -                    | +++                   | ++                    |
| FAAL13      | N.D.                 | +++                   | ++                    |
| FAAL15      | -                    | +                     | +                     |
| FAAL17      | +                    | +                     | +                     |
| FAAL19      | +                    | +                     | +                     |
| FAAL23      | -                    | +                     | +                     |
| FAAL26      | -                    | +                     | +                     |
| FAAL28      | -                    | +                     | +                     |
| FAAL29      | N.D.                 | +                     | N.D.                  |
| FAAL30      | N.D.                 | +                     | -                     |
| FAAL32      | N.D.                 | -                     | +                     |

## Supplementary Table 3 : Primers used in the study

| Mutant protein                  | Primers sequence                                                                                                                                                                                                                          |                                |
|---------------------------------|-------------------------------------------------------------------------------------------------------------------------------------------------------------------------------------------------------------------------------------------|--------------------------------|
| FACL19L172Q                     | 5'GAC GCC ATC TAT CTG CAG TAC ACC GGC GGC ACC 3'<br>5'GGT GCC GCC GGT GTA CTG CAG ATA GAT GGC GTC 3'                                                                                                                                      |                                |
| FACL19G179R                     | 5'CC GGC GGC ACC ACC CGT TTC CCC AAG GGT GTG 3'<br>5'CAC ACC CTT GGG GAA ACG GGT GGT GCC GCC GG 3'                                                                                                                                        |                                |
| FACL19K182A                     | 5'CC ACC GGT TTC CCC GCG GGT GTG ATG TGG CG 3'<br>5'CG CCA CAT CAC ACC CGC GGG GAA ACC GGT GG 3'                                                                                                                                          |                                |
| <b>Hybrid protein</b>           |                                                                                                                                                                                                                                           |                                |
| FACL17N28C                      | 5'GGC GGC GTC TAC CAC ACC GGT GAC CTC GCC TAT CGC 3'<br>5'GCG ATA GGC GAG GTC ACC GGT GTG GTA GAC GCC GCC 3'      and<br>5'GGT CCT TGG CTA AGA ACC GGT GAC TCA GGT TTC GTC3'<br>5'GAC GAA ACC TGA GTC ACC GGT TCT TAG CCA AGG ACC 3'      |                                |
| FACL17N15C                      | 5'GGC GTC TAC CAC AGT GGA GAT CTC GCC TAT CGC GAC 3'<br>5'GTC GCG ATA GGC GAG ATC TCC ACT GTG GTA GAC GCC 3'      and<br>5'GAC GGC TGG TTC AAG ACC GGA GAT CTC GGT GCG GTG 3'<br>5'CAC CGC ACC GAG ATC TCC GGT CTT GAA CCA GCC GTC 3'     |                                |
| FACL17N29C                      | 5'GGC GTC TAC CAC AGT GGA GAT CTC GCC TAT CGC GAC 3'<br>5'GTC GCG ATA GGC GAG ATC TCC ACT GTG GTA GAC GCC 3'      and<br>5'TGG CTG CGG ACC GGA GAT CTC GGC GTC ATT TTC GAG G 3'<br>5'C CTC GAA AAT GAC GCC GAG ATC TCC GGT CCG CAG CCA 3' |                                |
| <b>FadD homolog</b>             |                                                                                                                                                                                                                                           |                                |
| <i>Rhodococcus RHA1 ro_4064</i> | 5' TT GAA TTC CTA TTC GGA AAC GCT ATC GGG GAA 3'<br>5' TTG AAT TCG TTC GGA AAC GCT ATC GGG GAA GGC                                                                                                                                        |                                |
| Insertion/<br>deletion          | Primer sequence                                                                                                                                                                                                                           | Engineered<br>restriction site |
| FACL19 <sub>i</sub>             | 5' CGG TAC CAG CGT CGC TAG CGC CGG GCA GGC GC 3'<br>5' GCG CCT GCC CGC CGC TAG CGA CGC TGG TAC CG                                                                                                                                         | Nhe I                          |
|                                 | 5' GGC CCC GGG CTA GCA TCG ACC ATC GCA CCG 3'<br>5' CGG TGC GAT GGT CGA TGC TAG CCC GGG GCC 3'                                                                                                                                            | Nhe I                          |
| FAAL28 <sub>Δ0</sub>            | 5' GCT AGC GCA CGG CTT CGC ATG GCC GGC GGA 3'                                                                                                                                                                                             | Nhe I                          |
| FAAL28 <sub>Δ1</sub>            | 5' GCT AGC TAA ACT TTC AGT ATC GAA GTC GAC 3'                                                                                                                                                                                             | Nhe I                          |
| FAAL28 <sub>Δ2</sub>            | 5' GCT AGC GAC GGT CTC CGG TGG TTG ACC GCC AAA 3'                                                                                                                                                                                         | Nhe I                          |
| FAAL28 <sub>Δ3</sub>            | 5' GGC GGC GCT ACT AGT TTG ATC AGC TAC ATG 3'<br>5' CAT GTA GCT GAT CAA ACT AGT AGC GCC GCC 3'                                                                                                                                            | Nhe I                          |
|                                 | 5' GGC GGC GCT ACT AGT TTG ATC AGC TAC ATG 3'<br>5' CAT GTA GCT GAT CAA ACT AGT AGC GCC GCC 3'                                                                                                                                            | Spe I                          |
| FAAL28 <sub>Δ</sub>             | 5' CCG TCG ACT TCG ATG CTA GCA GTT TAT CCG CCG GCC 3'<br>5' GGC CGG CGG ATA AAC TGC TAG CAT CGA AGT CGA CGG 3'                                                                                                                            | Nhe I                          |
|                                 | 5'CCG GCC ATG CGA AGA CTA GTG CAG GCG GCG GCG C 3'<br>5' GCG CCG CCG CCT GCA CTA GTC TTC GCA TGG CCG G 3'                                                                                                                                 | Spe I                          |
| FACL19 <sub>AS</sub>            | 5' CTA GTG CTG CCA GTG CAG CGA GCT CTG CTT CCT CAG<br>CCT CGG CAG CGG 3'<br>5' CTAG CCG CTG CCG AGG CTG AGG AAG CAG AGC TCG CTG<br>CAC TGG CAG C 3'                                                                                       | Nhe I                          |

## Supplementary Table 4 : Data collection and refinement statistics for FAAL28 N-terminal domain MAD (SeMet) structure.

|                                                      |                              | FAAL28 N-terminal<br>domain SeMet* |                          |  |
|------------------------------------------------------|------------------------------|------------------------------------|--------------------------|--|
| <b>Data collection</b>                               |                              |                                    |                          |  |
| Space group                                          | P2(1)2(1)2(1)                |                                    |                          |  |
| Cell dimensions                                      |                              |                                    |                          |  |
| <i>a</i> , <i>b</i> , <i>c</i> (Å)                   | 50.97, 60.74, 136.54         |                                    |                          |  |
| $\alpha$ , $\beta$ , $\gamma$ (°)                    | 90, 90, 90                   |                                    |                          |  |
|                                                      | <i>Peak</i>                  | <i>Inflection</i>                  | <i>Remote</i>            |  |
| Wavelength                                           | 0.9792                       | 0.9800                             | 0.9776                   |  |
| Resolution (Å)                                       | 20.0-2.35<br>(2.39-2.35)     | 20.0-2.35<br>(2.39-2.35)           | 20.0-2.35<br>(2.39-2.35) |  |
| <i>R</i> <sub>sym</sub> or <i>R</i> <sub>merge</sub> | 9.3 (43.4)                   | 7.7 (41.4)                         | 8.4 (42.7)               |  |
| <i>I</i> / $\sigma I$                                | 19.72 (3.44)                 | 23.13 (3.54)                       | 21.87 (3.36)             |  |
| Completeness (%)                                     | 99.5 (93.8)                  | 99.3 (93.2)                        | 99.7 (95.9)              |  |
| Redundancy                                           | 7.0 (5.5)                    | 6.9 (5.5)                          | 6.3 (4.9)                |  |
| <b>Refinement</b>                                    |                              |                                    |                          |  |
| Resolution (Å)                                       | 20-2.35 (2.43-2.35)          |                                    |                          |  |
| No. reflections                                      | 17986 (1436)                 |                                    |                          |  |
| <i>R</i> <sub>work</sub> / <i>R</i> <sub>free</sub>  | 0.207/0.267<br>(0.286/0.356) |                                    |                          |  |
| No. atoms                                            |                              |                                    |                          |  |
| Protein                                              | 3,231                        |                                    |                          |  |
| Ligand/ion                                           | -                            |                                    |                          |  |
| Water                                                | 240                          |                                    |                          |  |
| <i>B</i> -factors                                    |                              |                                    |                          |  |
| Protein                                              | 31.5                         |                                    |                          |  |
| Ligand/ion                                           | -                            |                                    |                          |  |
| Water                                                | 38.3                         |                                    |                          |  |
| R.m.s deviations                                     |                              |                                    |                          |  |
| Bond lengths (Å)                                     | 0.006                        |                                    |                          |  |
| Bond angles (°)                                      | 1.3                          |                                    |                          |  |

\*Data collected from one crystal. \*\*Highest-resolution shell is shown in parentheses.

The coordinates of FAAL28 N-terminal domain have been deposited in the Protein Data Bank with access code 3E53.

## Supplementary method : Synthesis of acyl-AMS analogues (LAMS, HAMS and AAMS)

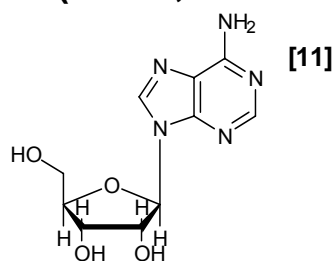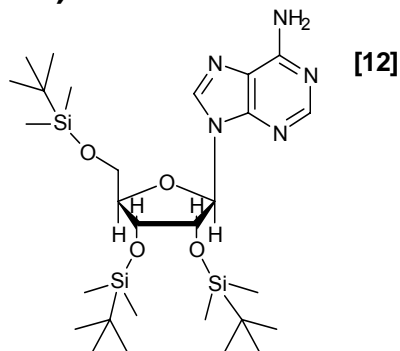

### 2', 3', 4'-O,O,O-tris(t-butyltrimethylsilyl)adenosine [12].

tert-butyltrimethylsilyl chloride (3.5 equiv) in anhydrous DMF was added to a solution of (-) adenosine [10] imidazole (9.0 equivalents) in anhydrous DMF and stirred overnight. The reaction mixture was then diluted with CH<sub>2</sub>Cl<sub>2</sub>, washed thrice with saturated NaHCO<sub>3</sub> and dried with MgSO<sub>4</sub>, filtered and concentrated. The white residue was characterized as 2', 3', 4'-O,O,O-tris(t-butyltrimethylsilyl)adenosine [12]. Compound [12] is identical to the one reported in<sup>1</sup>.

ESI-MS m/z of 610.2 [M+H]<sup>+</sup> was obtained for a calculated mass of 610.36

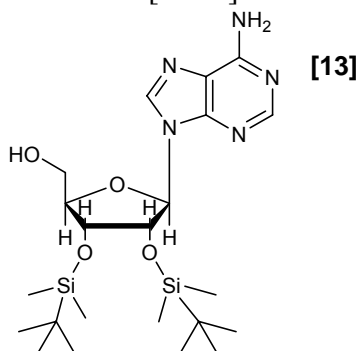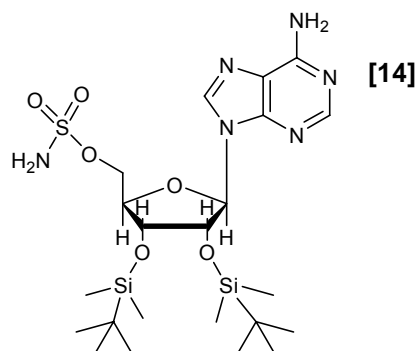

### 2',3'-bis(t-butyltrimethylsilyl)adenosine [13]

A mixture of TFA and H<sub>2</sub>O (1:1) was added to a cooled solution of [12]. The reaction mixture was stirred at 0 °C for 5 h. The aqueous layer was extracted with ethyl acetate after adding NaHCO<sub>3</sub> solution. This extract was washed with H<sub>2</sub>O and dried with MgSO<sub>4</sub>, filtered and concentrated. The white solid obtained was characterized as 2', 3'-O,O-bis(t-butyltrimethylsilyl)-O-sulfamoyladenosine [13].

Compound [13] is identical to the one reported in<sup>1</sup>.

ESI-MS m/z of 496.3 [M+H]<sup>+</sup> was obtained for a calculated mass of 496.27

### 2', 3'-O,O-bis(t-butyltrimethylsilyl)-O-sulfamoyladenosine [14]

Bis(tri-butyltin)oxide (3.5 equivalents) was added dropwise to a solution of [13] in anhydrous benzene. The resulting white suspension was refluxed with stirring for 2 h and sulfamoyl chloride (4.5 equivalents) in dioxane was added dropwise to the reaction mixture, stirred for an additional hour at 5 °C. The residue obtained by vacuum concentration was rinsed with hot (40 °C) hexane. The solid was washed with 1 N NH<sub>3</sub> solution in MeOH and dried.

The residue was characterized as 2', 3'- O,O-bis(t-butyl dimethylsilyl)-O-(N-dodecanoyl)sulfamoyl adenosine [14].

Compound [14] is identical to the one reported in<sup>1</sup>.

**ESI-MS** m/z (pos) 575.3 [M+H]<sup>+</sup> for a calculated mass of 575.25

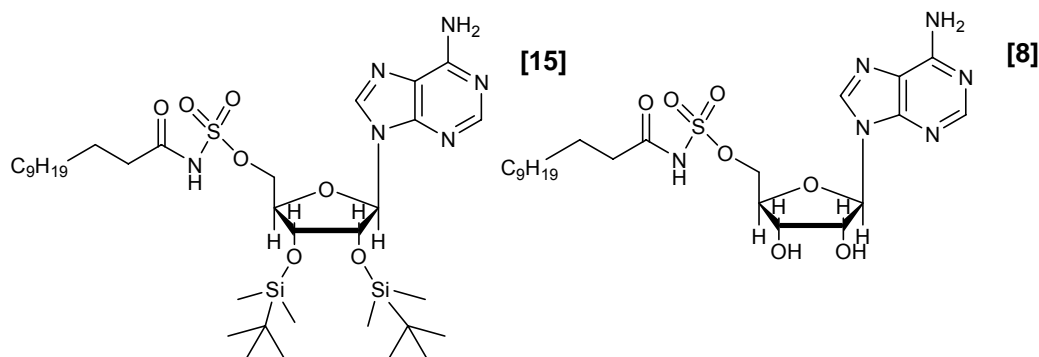

### 2', 3'-O,O-bis(t-butyl dimethylsilyl)-O-(N-dodecanoyl) sulfamoyl adenosine [15]

A solution of lauric acid (3.0 equivalents) and 1,1- carbonyldiimidazole (3.6 equivalents) in anhydrous acetonitrile was stirred at 60 °C for 2 h under Argon atmosphere. The reaction mixture was cooled to room temperature. A mixture of [14] and DBU (1.5 equivalents) was then added dropwise to the reaction mixture. The resulting yellow solution was again stirred at 60 °C. After an additional 30 min, the reaction mixture was diluted with H<sub>2</sub>O. The aqueous layer was extracted thrice with ethyl acetate, washed with 1N HCl, saturated aqueous solution of NaHCO<sub>3</sub>, dried with MgSO<sub>4</sub>, filtered and concentrated. The residue was purified by flash chromatography and was characterized as 2',3'-O,O-bis(t-butyl dimethylsilyl)-O-(N-dodecanoyl)sulfamoyl adenosine [15].

**ESI-MS** m/z (pos) 757.3 [M+H]<sup>+</sup> for a calculated mass of 757.41

### 5'-O-(N-dodecanoylsulfamoyl) adenosine (LAMS) [8]

TBAF (1.0 equivalents in THF, 2.5 equivalents) was added dropwise to a solution of [15] in anhydrous THF. The solvent was evaporated after stirring for 30 min. The residue was purified by flash chromatography to yield 5'-O-(N-dodecanoylsulfamoyl) adenosine [8] as a white solid.

**ESI-MS** m/z (pos) 529.7 [M+H]<sup>+</sup> for a calculated mass of 529.24

**<sup>1</sup>H-NMR** (300 MHz, DMSO-d<sub>6</sub>) δ 8.4 (s, 1H), δ 8.13 (s, 1H), δ 7.25 (s, 2H), 5.90 (d, 1H, J=5.7), 5.45 (d, 1H, J= 6.0), 5.30 (d, 1H, J=4.2), 4.59 (m, 1H), δ 4.15 – 3.90 (m, 4H, J= 29.7), δ 1.96 (t, 2H), δ 1.22 (m, 20H), δ 0.83 (t, 3H)

**<sup>13</sup>C-NMR** (75 MHz, DMSO-d<sub>6</sub>) 178.15, 155.99, 152.57, 149.64, 139.38, 118.86, 115.35, 86.79, 82.76, 73.61, 70.90, 67.05, 31.28, 29.07, 29.04, 25.89, 22.07, 13.94

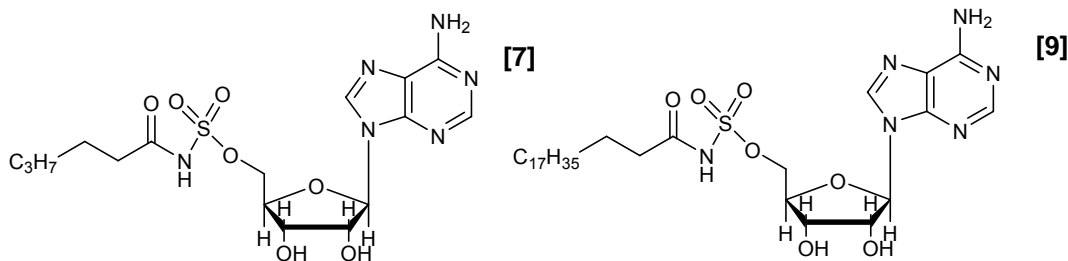

5'-O-(N-hexanoylsulfamoyl) adenosine (HAMS) [7] and 5'-O-(N-icosanoylsulfamoyl) adenosine (AAMS) [9] were synthesized in a manner identical to [8], from [14] using hexanoic acid and icosanoic acid respectively and characterized using mass spectrometry and NMR as follows:

#### 5'-O-(N-hexanoylsulfamoyl) adenosine (HAMS) [7]

**ESI-MS**  $m/z$  (pos) 445.5  $[M+H]^+$  for a calculated mass of 445.15

**$^1\text{H-NMR}$**  (300 MHz,  $\text{CD}_3\text{OD}$ )  $\delta$  8.68 (s, 1H),  $\delta$  8.12 (s, 1H),  $\delta$  6.03 (d, 1H),  $\delta$  3.9-3.6 (m, 1H),  $\delta$  2.18 (t, 2H),  $\delta$  1.57 (m, 2H),  $\delta$  1.29 (m, 4H),  $\delta$  0.96 (t, 3H),.

**$^{13}\text{C-NMR}$**  (300 MHz,  $\text{CD}_3\text{OD}$ )  $\delta$  156.1, 152.4, 149.9, 140.4, 119.5, 90.8, 80.1, 75.4, 73.8, 62.4, 31.9, 29.7, 25.1, 22.8

#### 5'-O-(N-icosanoylsulfamoyl) adenosine (AAMS) [9]

**ESI-MS**  $m/z$  (pos) 641.8  $[M+H]^+$  for a calculated mass of 641.37

**$^1\text{H-NMR}$**  (300 MHz,  $\text{DMSO-d}_6$ )  $\delta$  8.30 (s, 1H), 8.13 (s, 1H),  $\delta$  7.25 (s, 2H),  $\delta$  5.90 (d, 1H  $J=6.3$ ),  $\delta$  5.54 (d, 1H,  $J=6.9$ ),  $\delta$  5.31 (d, 1H,  $J=6.0$ ),  $\delta$  4.59 (m, 1H),  $\delta$  4.14-3.97 (m, 10H),  $\delta$  3.16 – 3.17 (m, 14H),  $\delta$  1.97 (t, 2H),  $\delta$  1.43 (s, 3H),  $\delta$  1.21 (m, 42H),  $\delta$  0.82 (t, 4H)

**$^{13}\text{C-NMR}$**  (75 MHz,  $\text{DMSO-d}_6$ ) 179.04, 158.14, 157.73, 156.46, 153.06, 150.08, 139.88, 119.66, 119.35, 115.69, 87.38, 74.03, 71.30, 67.72, 31.74, 29.51, 29.47, 26.33, 22.53, 14.37

#### Reference

1. Ferreras, J. A., Ryu, J. S., Di Lello, F., Tan, D. S. & Quadri, L. E. Small-molecule inhibition of siderophore biosynthesis in *Mycobacterium tuberculosis* and *Yersinia pestis*. *Nat Chem Biol* **1**, 29-32 (2005).
